# Supplementary material
Source: HighWire-hosted journal article supplement (https://ard.bmj.com/content/79/2/232)

## SUPPL. FIGURE 1

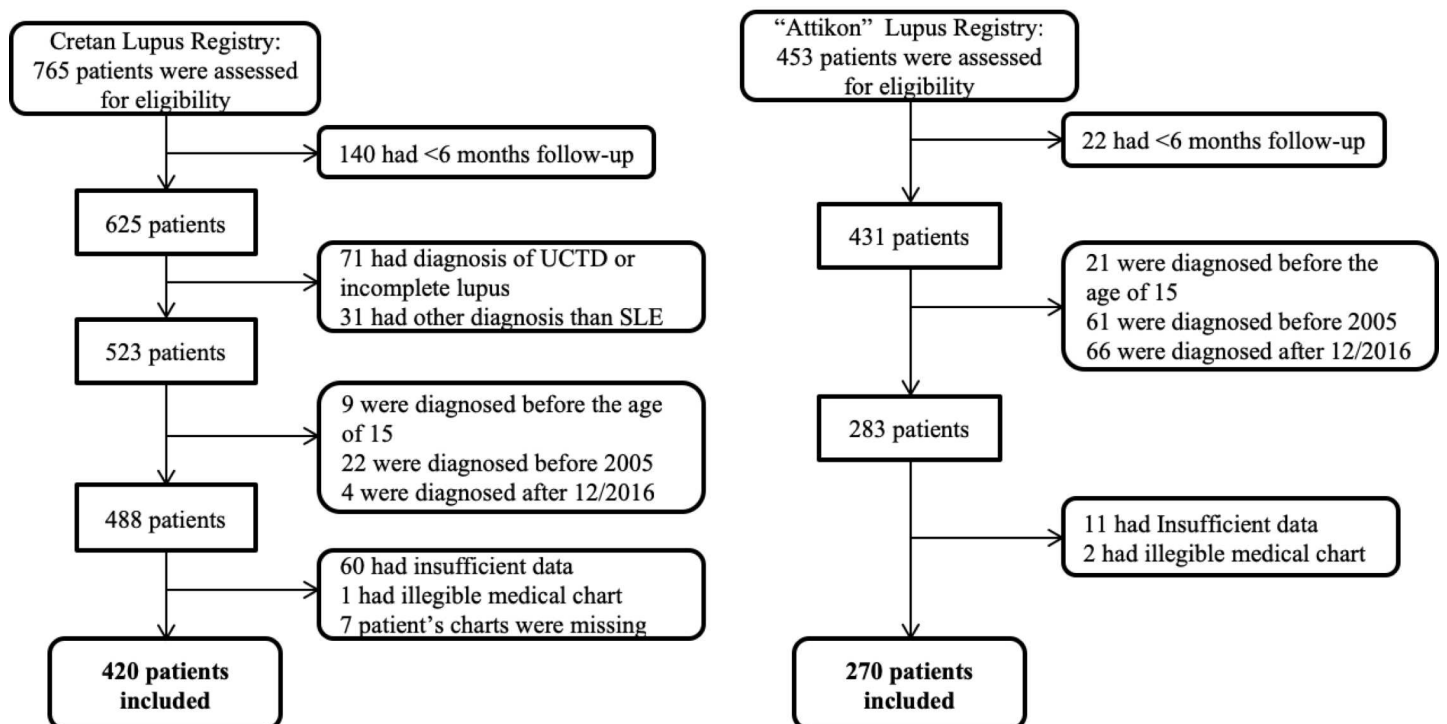

Supplement: inline-supplementary-material-2 [file inline-supplementary-material-2.pdf]
